# Supplementary material for: Quality and Readability Assessment of Arabic Online Content for Developmental Dysplasia of The Hip: A Cross-Sectional Survey
Source: Research Square preprint supplement (doi:10.21203/rs.3.rs-4950291/v1), 2024-10-15
Supplement: Supplementary file 1 [file 47365a43f6674c43b7478b4a.docx]

Appendix:

| Serial Number | Link HTML |
| --- | --- |
| 1 | <https://altibbi.com/مصطلحات-طبية/امراض-العضلات-والعظام-و-المفاصل/خلع-الورك> |
| 2 | <https://ar.wikipedia.org/wiki/%D8%AE%D9%84%D9%84_%D8%A7%D9%84%D8%AA%D9%86%D8%B3%D8%AC_%D8%A7%D9%84%D9%88%D8%B1%D9%83%D9%8A_%D8%A7%D9%84%D8%AE%D9%84%D9%82%D9%8A> |
| 3 | https://www.draydinarslan.com/ar/خلع-الورك/ |
| 4 | https://www.omerfarukbilgen.com/غير-مصنف/أسئلة-متكررة-عن-خلع-الورك-عند-الأطفال/?lang=ar |
| 5 | https://alghad.com/الخلع-الوركي-لحديثي-الولادة-تشخيصة-أس/ |
| 6 | <https://www.alriyadh.com/807061> |
| 7 | <https://www.alkawthar.org.sa/blog/article/8269> |
| 8 | https://www.sayidaty.net/node/1043176/سيدتي-وطفلك/مولودك/خلع-الورك-الولادي |
| 9 | <https://www.alwatan.com.sa/article/1019906> |
| 10 | <https://hipdysplasia.org/wp-content/uploads/2020/05/What-is-HIP-ARABIC.pdf> |
| 11 | <https://bimaristantr.com/specialties/orthopedics-traumatology/pediatric-surgery/hip-dysplasia/> |
| 12 | https://hasanmuratli.com.tr/ar/services/خلع-الورك/ |
| 13 | https://www.alkhaleej.ae/ملحق/«الخلع-الولادي»يسبب-عدم-القدرة-على-الحركة |
| 14 | https://www.aljoumhouria.com/ar/news/396613/خلع-الورك-الولادي-الاهمال-يسبب-العرج-الدايم-للطفل%0D%0A |
| 15 | <http://www.gulfkids.com/ar/index.php?action=show_res&r_id=15&topic_id=240> |
| 16 | <https://www.ammonnews.net/article/499678> |
| 17 | <https://www.mayoclinic.org/ar/diseases-conditions/hip-dysplasia/symptoms-causes/syc-20350209> |
| 18 | https://talaclinics.com/طرق-علاج-الخلع-الوركي-عند-الأطفال/ |
| 19 | https://www.mawlood.info/خلع-الورك-عند-حديثي-الولادة |
| 20 | <https://www.okaz.com.sa/citizen-voice/na/1588563> |
| 21 | https://www.alqabas.com/article/477815-دلالات-خلع-مفصل-حوض-الطفل |
| 22 | <http://www.sana.sy/?p=347935> |
| 23 | https://www.tbeeb.net/health/خلع-الورك-الولادي-للاطفال/ |
| 24 | <https://www.al-jazirah.com/2001/20010131/as1.htm> |
| 25 | <https://ilkersarikaya.com/ar/gelisimsel-kalca-displazisi-3/> |
| 26 | https://www.marefa.org/خلع_الورك_الولادي |
| 27 | <https://www.aleqt.com/2010/08/15/article_429918.html> |
| 28 | <https://www.enabbaladi.net/archives/39677> |
| 29 | <https://faharas.net/childbirth-dislocation/> |
| 30 | https://jeeljdeed.com/n/أسباب-خلع-الورك-الولادي-وطرق-تجنبه |
| 31 | https://www.supermama.me/posts/أسباب-خلع-الورك-عند-الأطفال |
| 32 | <https://kingscollegehospitaldubai.com/ar/service/paediatric-orthopaedics/hip-dysplasia/> |
| 33 | https://mawdoo3.com/ما_هو_خلع_الولادة |
| 34 | https://eldoctorz.com/خطورة-خلع-الورك-الولادي-وكيفية-علاجه-ع/ |
| 35 | https://www.orthoist.com/ar/نمو-الورك-الشاذ/ |
| 36 | https://ar.nicolaportinaro.com/عسر-تصنع-تطوري-في-مفصل-الورك/ |
| 37 | https://twasul.info/664953/أطباء-إهمال-خلع-الورك-الولادي-يؤدي-إ/ |
| 38 | https://www.youm7.com/story/2015/9/10/د-خالد-عمارة-يكتب-خلع-مفصل-الفخذ-فى-الأطفال/2342578 |
| 39 | https://www.drhatemrawashdeh.com/علاج-خلع-الورك-عند-الاطفال-في-الاردن/ |
| 40 | https://www.athrpress.com/خلع-الورك-الولادي-التشخيص-والعلاج/أثر-منوع/صحة/ |
| 41 | <https://www.syr-res.com/article/12873.html> |
| 42 | <https://www.albayan.ae/culture/2002-05-15-1.1296384> |
| 43 | https://sotor.com/أعراض-خلع-الورك-عند-الأطفال/ |
| 44 | https://emarat-news.ae/258431/كل-ما-تريدين-معرفته-عن-خلع-الولادة/ |
| 45 | https://www.alanba.com.kw/ar/kuwait-news/advertising/500249/23-09-2014-الكشف-المبكر-خلع-الورك-عند-الولادة/ |
| 46 | https://anwan.me/4d767fce477f-كل-ما-يجب-عليك-معرفته-عن-خلع-الولادة-خلع-الورك-المفصلي |
| 47 | https://www.echoroukonline.com/تجنبوا-خلع-الولادة-عند-الأطفال-بالكشف |
| 48 | https://www.syrianclinic.com/forum/discussion/10594/هام-جدا-خلع-الورك-الولادي |
| 49 | https://medicazone.org/تعرف-على-الخلع-الوركي-عند-الاطفال/ |
| 50 | https://www.sehatok.com/الطفل/كل-ما-يهمك-معرفته-عن-خلع-مفصل-الورك-الولادي |
| 51 | https://rofancare.com/ar/article/اهمية-الكشف-المبكر-لخلع-الولادة-بواسطة-التراساوند |
| 52 | <https://www.almrsal.com/post/172046> |
| 53 | <https://laravel-staging.360moms.net/article/1290/khlaa-alork-alolady-aand-alatfal-alrdaa> |
| 54 | https://drkurdieh.com/خلع-الورك-الولادي/ |
| 55 | https://uniquewoman.net/2019/09/24/خلع-الورك-الولادي-أو-التطوري-عند-الأطف/ |
| 56 | https://www.q8yat.com/threads/خلع-الورك-للاطفال.15467/ |
| 57 | <https://arbyy.com/detail624957123.html> |
| 58 | https://www.aljamila.com/node/405181/الأم-والطفل/تربية-وعناية/خلع-الورك-الولادي |
